# Supplementary material for: Modulatory effects of BPC 157 on vasomotor tone and the activation of Src-Caveolin-1-endothelial nitric oxide synthase pathway
Source: PubMed Central journal article supplement (PMC7555539; doi:10.1038/s41598-020-74022-y), 2020-10-13

## **Modulatory effects of BPC 157 on vasomotor tone and the activation of Src-Caveolin-1-endothelial nitric oxide synthase pathway**

Ming-Jer Hsieh<sup>1, 2</sup>, M.D, PHD; Cheng-Hung Lee<sup>2</sup>, M.D, PHD; Ho-Yen Chueh<sup>3</sup>, M.D; Gwo-Jyh Chang<sup>1</sup>, PHD; Hsiu-Yun Huang<sup>1</sup>, M.S; Yuling Lin<sup>1</sup>, M.S; Jong-Hwei S. Pang<sup>1,4</sup>, PHD

<sup>1</sup> Graduate Institute of Clinical Medical Sciences, Chang Gung University, College of Medicine, Tao-Yuan City, Taiwan, ROC.

<sup>2</sup> Division of Cardiology, Department of Internal Medicine, Chang Gung Memorial Hospital-Linkou, Chang Gung University, Tao-Yuan City, Taiwan, ROC.

<sup>3</sup> Department of Obstetrics and Gynecology, Chang Gung Memorial Hospital, Lin-Kou Medical Center, Tao-Yuan City, Taiwan, ROC.

<sup>4</sup> Department of Physical Medicine and Rehabilitation, Chang Gung Memorial Hospital, Kwei-Shan, Tao-Yuan City, Taiwan, ROC.

Fig. S1

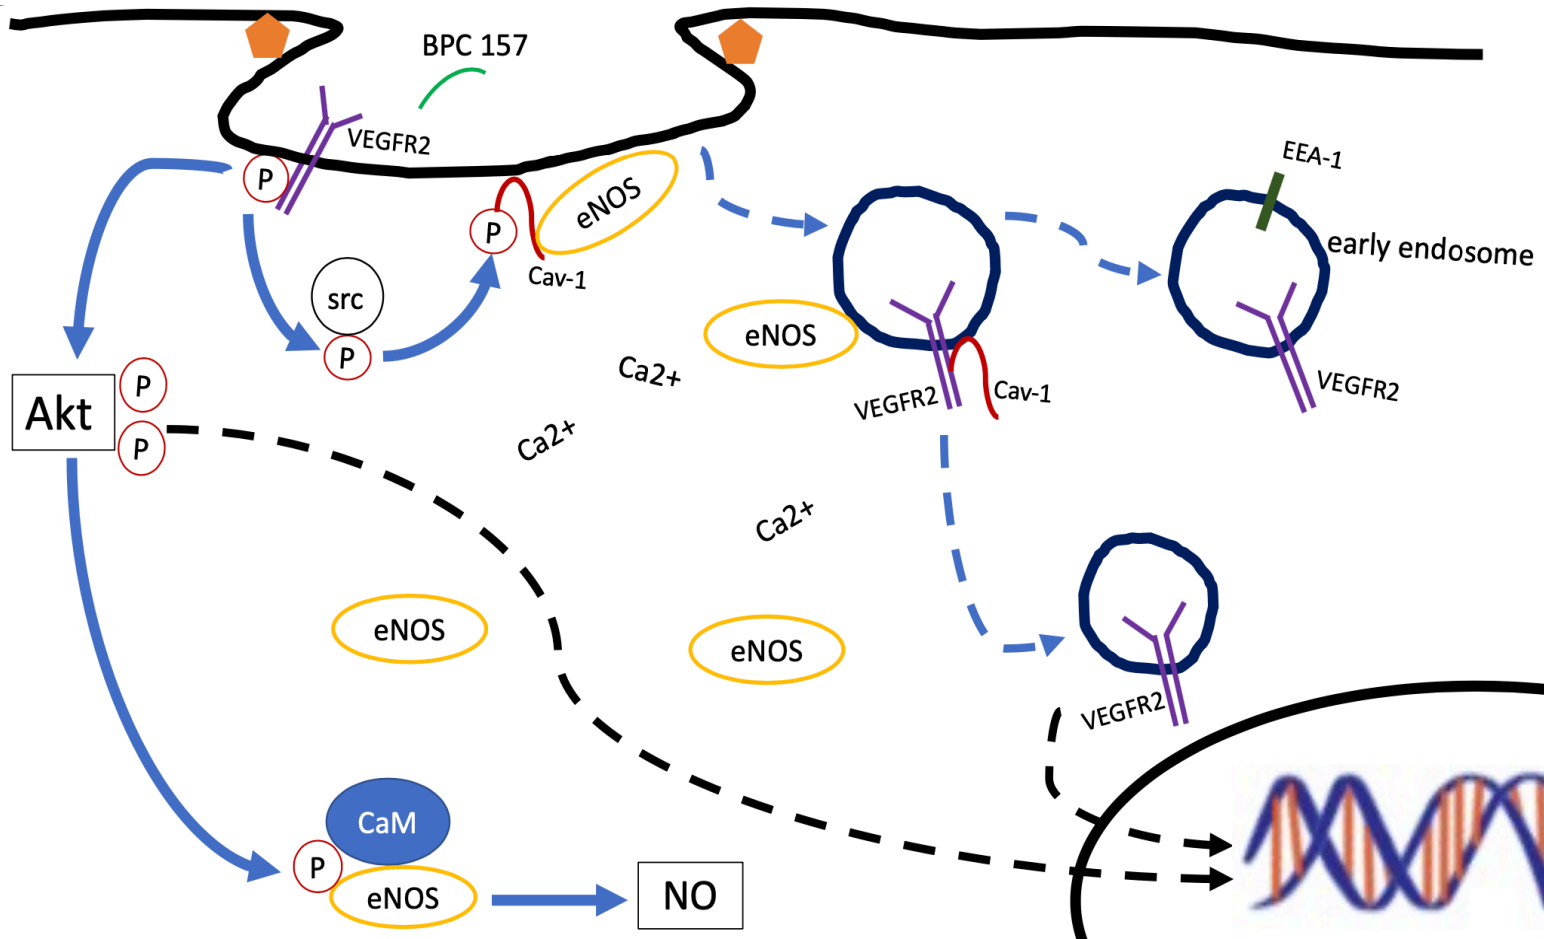

**Fig 5a. Supplement**

tubulin

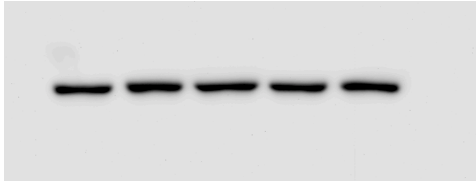

Src

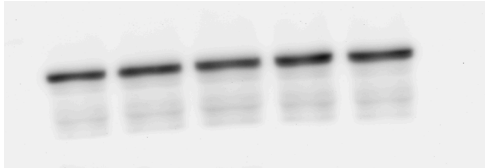

P-Src

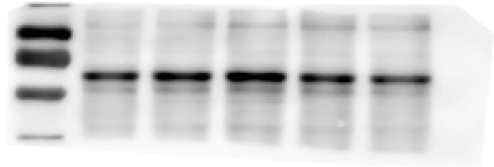

Cav-1

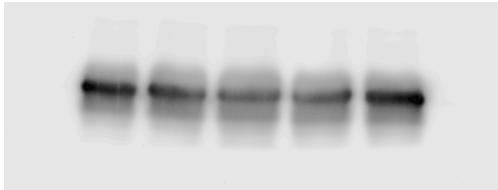

P-Cav-1

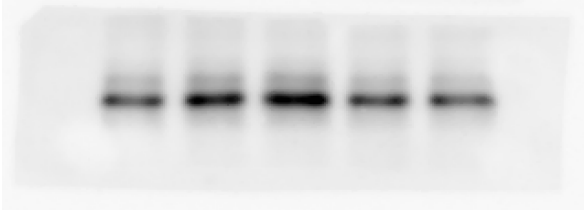

eNOS

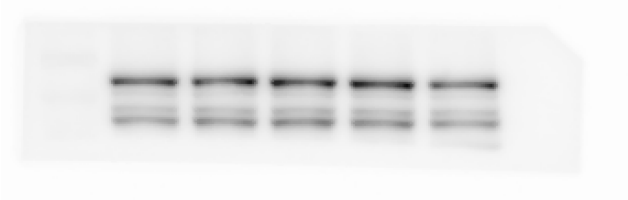

P-eNOS

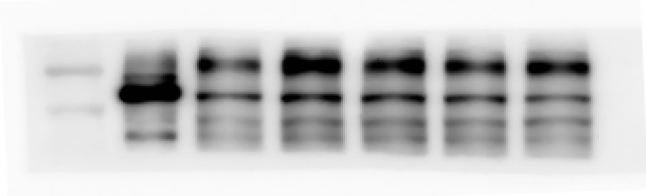

**Fig 5c. Supplement**

IB: eNOS

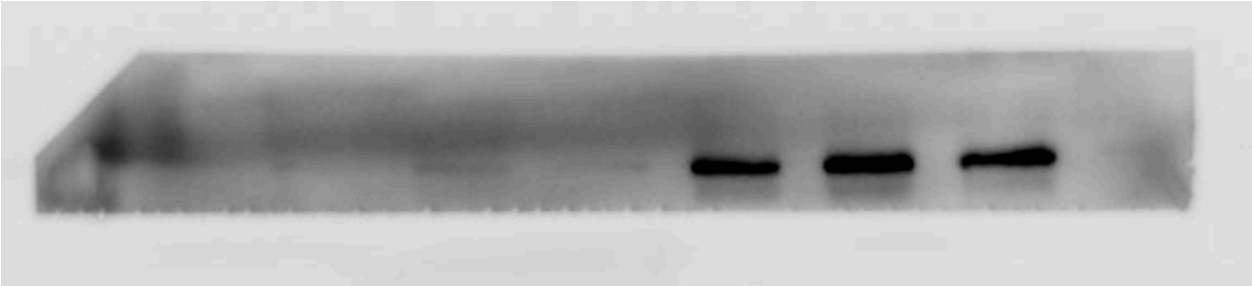

IB: Cav-1

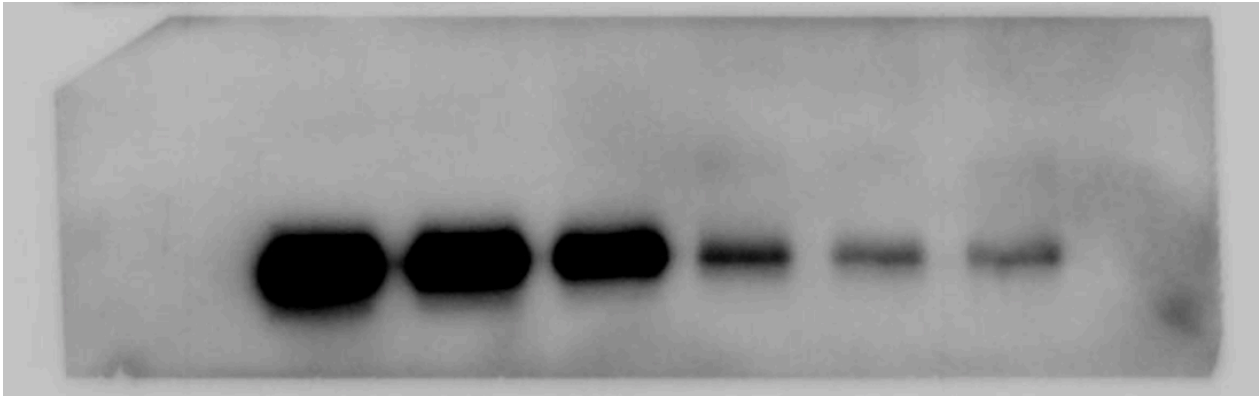

Supplement: 41598_2020_74022_MOESM1_ESM.pdf [file 41598_2020_74022_MOESM1_ESM.pdf]
